# Supplementary material for: Novel protein nanofibril–carbon hybrid adsorbent efficiently removes As(iii), As(v) and other toxic elements from synthetic and natural waters in batch and rapid small-scale column tests
Source: Royal Society of Chemistry journal article supplement (doi:10.1039/d2ew00502f), 2022-12-09
Supplement: d2ew00502f1.pdf [file d2ew00502f1.pdf]

Electronic Supplementary Material (ESI) for Environmental Science: Water Research & Technology.

This journal is © The Royal Society of Chemistry 2022

## Novel protein nanofibril–carbon hybrid adsorbent efficiently removes As(III), As(V) and other toxic elements from synthetic and natural waters in batch and rapid small-scale column tests

Akram Rahimi <sup>a,b</sup>, Sreenath Bolisetty <sup>\*a,b</sup> and Stephan J. Hug <sup>\*a</sup>

<sup>a</sup> Eawag, Swiss Federal Institute of Aquatic Science and Technology, CH-8600 Dübendorf, Switzerland.

<sup>b</sup> BluAct Technologies GmbH, Dufauxstrasse 57, CH- 8152 Glattpark, Switzerland.

\* Corresponding authors (sreenath@bluact.com, stephan.hug@eawag.ch)

Electronic Supplementary Information:

Fig. S1: Scheme of RSSCT column, Fig. S2: Preservation of nutrient ions].

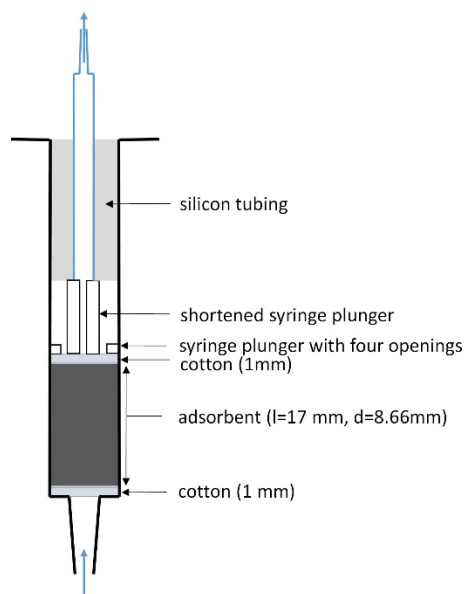

**Fig. S1** Scheme of the RSSCT columns for the multiple tests

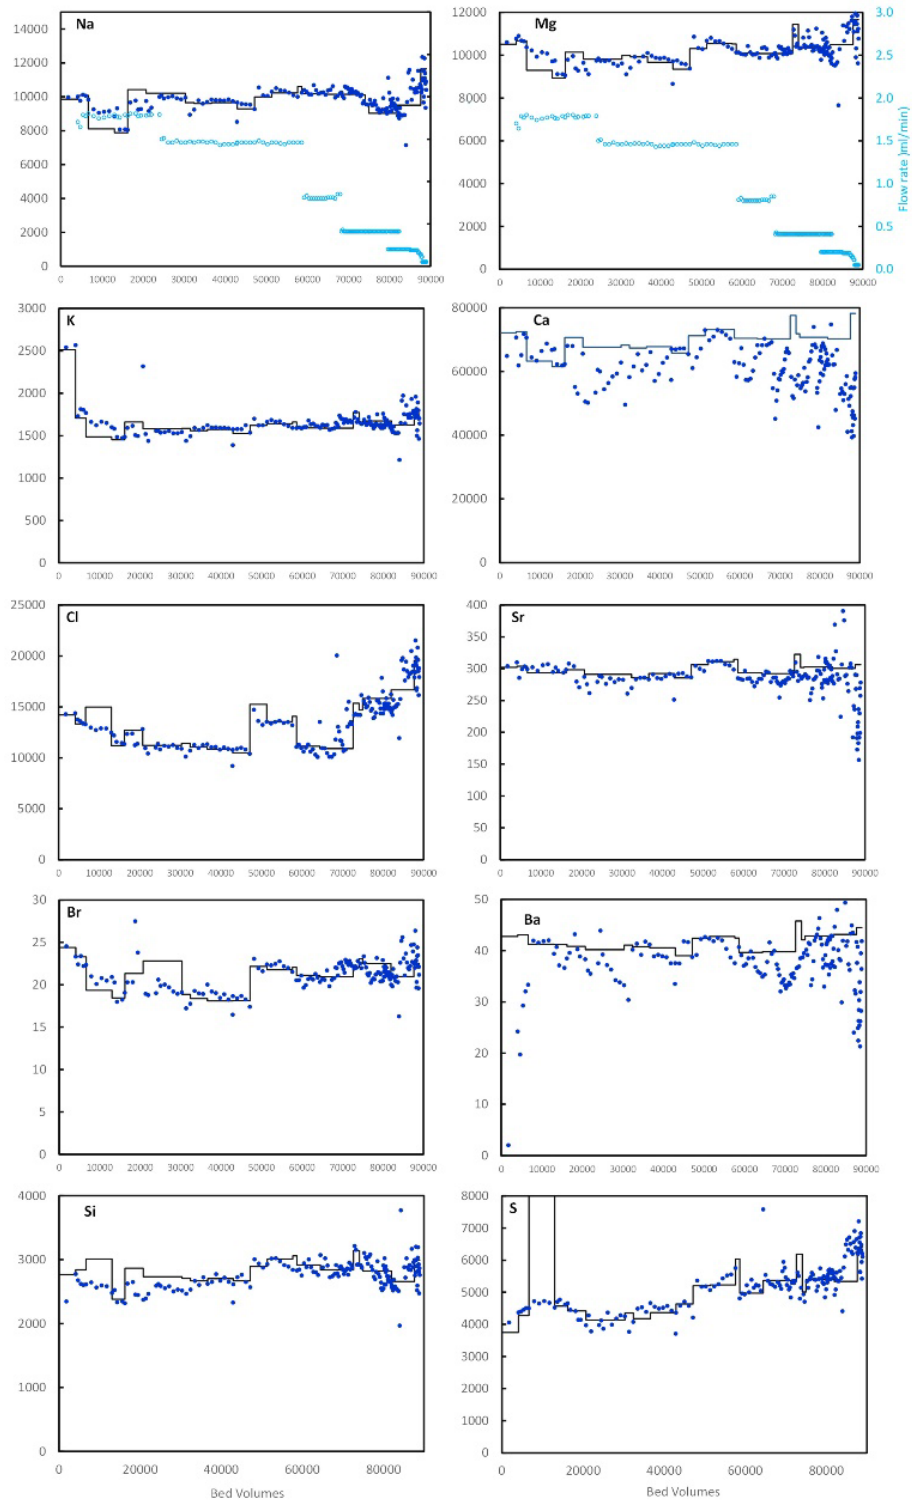

**Fig. S2** Naturally present and in this concentration range ( $\mu\text{g/L}$ ) considered as beneficial ions to the taste of drinking water are not removed.
